# Supplementary material
Source: Royal Society of Chemistry journal article supplement (https://www.rsc.org/suppdata/cp/1999/2415/tables1.doc)
Supplement: Supplementary file 1 [file tables1.doc]

**Table S1.** Observed and calculated rotational transition frequencies of and

|  |  |  |  |  | |  | | |
| --- | --- | --- | --- | --- | --- | --- | --- | --- |
|  |  |  |  |  |  | |  |  |
| *ma* transitions |  |  |  |  |  | |  |  |
| 303  202 | 9 |  | 7 | 7305.2193 | -1.1 | | 7258.3573 | -1.3 |
|  | 7 |  | 5 | 7305.1442 | -2.3 | | 7258.3045 | -0.6 |
|  | 5 |  | 3 | 7297.4283 | 0.8 | | - | - |
| 312  211 | 9 |  | 7 | 7500.1100 | 0.1 | | - | - |
|  | 7 |  | 5 | 7492.1300 | 0.9 | | - | - |
|  | 5 |  | 3 | 7492.6693 | 0.0 | | - | - |
|  | 7 |  | 7 | 7479.0147 | 0.2 | | - | - |
|  | 5 |  | 5 | 7502.2022 | 3.2 | | - | - |
| 313  212 | 9 |  | 7 | 7122.1811 | 1.0 | | - | - |
|  | 7 |  | 5 | 7114.2826 | -0.5 | | - | - |
|  | 5 |  | 3 | 7113.4561 | -1.5 | | - | - |
| 404  303 | 11 |  | 9 | 9733.6120 | 0.0 | | 9671.4825 | 0.0 |
|  | 9 |  | 7 | 9733.4432 | 0.0 | | 9671.3714 | 0.2 |
|  | 7 |  | 5 | 9729.8486 | 1.3 | | 9668.5352 | 5.5 |
|  | 5 |  | 3 | 9729.7943 | 2.7 | | 9668.5093 | -4.0 |
|  | 9 |  | 9 | 9702.0306 | 0.4 | | - | - |
|  | 7 |  | 7 | 9744.6601 | -2.6 | | - | - |
|  | 5 |  | 5 | 9761.0370 | -1.9 | | - | - |
|  | 7 |  | 9 | 9713.3301 | 80.3 | | - | - |
| 413  312 | 11 |  | 9 | 9995.5391 | -1.2 | | 9930.1362 | -1.5 |
|  | 9 |  | 7 | 9992.5793 | -0.2 | | 9927.7760 | 1.6 |
|  | 7 |  | 5 | 9990.8715 | -0.4 | | - | - |
|  | 5 |  | 3 | 9994.4248 | 2.0 | | - | - |
|  | 9 |  | 9 | 9971.4826 | -1.5 | | - | - |
|  | 7 |  | 7 | 10000.9432 | 1.3 | | - | - |
|  | 5 |  | 5 | 10015.2301 | 2.6 | | - | - |
| 414  313 | 11 |  | 9 | 9491.9692 | 2.2 | | 9432.4075 | 1.3 |
|  | 9 |  | 7 | 9488.7983 | 0.8 | | 9429.9122 | -0.5 |
|  | 7 |  | 5 | 9486.8854 | 1.1 | | - | - |
|  | 5 |  | 3 | 9490.0144 | -0.4 | | - | - |
|  | 9 |  | 9 | 9462.8949 | -1.1 | | - | - |
|  | 7 |  | 7 | 9499.0522 | -4.5 | | - | - |
|  | 5 |  | 5 | 9515.9770 | -2.8 | | - | - |
| 422  321 | 11 |  | 9 | 9759.9558 | -2.8 | | - | - |
|  | 9 |  | 7 | 9747.4400 | 2.0 | | - | - |
|  | 7 |  | 5 | 9751.8644 | -0.4 | | - | - |
| 423  322 | 11 |  | 9 | 9748.4324 | -0.2 | | - | - |
|  | 9 |  | 7 | 9735.8525 | -0.8 | | - | - |
|  | 7 |  | 5 | 9740.2868 | 0.4 | | - | - |
| 505  404 | 13 |  | 11 | 12157.4469 | 0.0 | | 12080.1073 | 3.3 |
|  | 11 |  | 9 | 12157.6412 | -1.6 | | 12080.2108 | -1.9 |
|  | 9 |  | 7 | 12155.2695 | -1.0 | | 12078.3806 | -1.3 |
|  | 7 |  | 5 | 12155.7210 | -1.1 | | 12078.6718 | -0.4 |
| 514  413 | 13 |  | 11 | 12491.0695 | -0.7 | | - | - |
|  | 11 |  | 9 | 12489.4091 | 0.0 | | - | - |
|  | 9 |  | 7 | 12488.2864 | -0.5 | | - | - |
|  | 7 |  | 5 | 12489.7521 | 1.5 | | - | - |

**Table S1.** (Continued)

|  |  |  |  |  | |  | |
| --- | --- | --- | --- | --- | --- | --- | --- |
| 515  414 | 13 |  | 11 | 11861.3047 | 2.0 | 11787.1643 | 3.1 |
|  | 11 |  | 9 | 11859.7037 | -2.9 | 11785.9090 | -3.8 |
|  | 9 |  | 7 | 11858.1519 | 1.7 | - | - |
|  | 7 |  | 5 | 11859.7356 | 8.6 | - | - |
|  | 11 |  | 11 | 11830.6314 | 4.2 | - | - |
|  |  |  |  |  |  |  |  |
| *mb* transitions |  |  |  |  |  |  |  |
| 111  000 | 5 |  | 3 | 12660.3878 | 2.0 | 10351.2155 | -13382.2 |
| 110  101 | 5 |  | 3 | 10374.2990 | 0.0 | - | - |
|  | 3 |  | 1 | 10336.0278 | 0.0 | - | - |
|  | 5 |  | 5 | 10343.0265 | 3.7 | - | - |
|  | 3 |  | 5 | 10361.1355 | -1.5 | - | - |
|  | 1 |  | 3 | 10359.8092 | 1.2 | - | - |
| 211  202 | 5 |  | 3 | 10470.7236 | 2 | - | - |
|  | 7 |  | 7 | 10475.0309 | -0.7 | - | - |
|  | 5 |  | 5 | 10493.2539 | -2.2 | - | - |
|  | 3 |  | 3 | 10480.2528 | 1.5 | - | - |
|  | 3 |  | 5 | 10502.7836 | 2.2 | - | - |
| 312  303 | 9 |  | 9 | 10669.9229 | 1.8 | - | - |
|  | 7 |  | 7 | 10680.2693 | 30.6 | - | - |
|  | 5 |  | 5 | 10675.4958 | 2.6 | - | - |
|  | 3 |  | 3 | 10665.0361 | -14.6 | - | - |
| 413  404 | 11 |  | 11 | 10931.8497 | 0.7 | - | - |
|  | 9 |  | 9 | 10939.3717 | -3.3 | - | - |
|  | 7 |  | 7 | 10936.5185 | 0.7 | - | - |
|  | 5 |  | 5 | 10929.6878 | 5.9 | - | - |
